# Supplementary material for: Factors influencing emergency medicine residency choice: Diversity, community, and recruitment red flags
Source: PubMed Central journal article supplement — AEM Educ Train. 2021 Aug 1;5(4):e10638. doi: 10.1002/aet2.10638 (PMC8393195; doi:10.1002/aet2.10638), 2021-08-01
Supplement: AET2-5-e10638-s001.pdf [file AET2-5-e10638-s001.pdf]

## Factors Influencing Program Choice for Emergency Medicine-Bound Medical Students

How old are you?

What is your gender?

- Male
- Female
- Other or non-binary
- Prefer not to answer

Do you identify as LGBTQIA+?

- Yes
- No
- Prefer not to answer

Are you a member of a population that is underrepresented in medicine?

(AAMC definition: African Americans and/or Black, Hispanic/Latino, Native American (American Indians, Alaska Natives, and Native Hawaiians), Pacific Islander, and mainland Puerto Rican OR from a disadvantaged background)

- Yes
- No
- Prefer not to answer

What is your race?

- White/Caucasian
- Black or African American
- American Indian or Alaskan Native
- Asian
- Native Hawaiian or other Pacific Islander
- Multiracial (please specify)
- Other (please specify)
- Prefer not to answer

Are you of Hispanic/Latino origin?

- Yes
- No
- Prefer not to answer

What is your marital status?

- Committed partner/married
- Divorced
- Widowed
- Separated
- Single (never married)
- Prefer not to answer

Are you a non-traditional applicant? (e.g. 2nd career, late entry, other degrees)

- Yes
- No
- Prefer not to answer

If your medical school is located within the United States, in which state is it located?

How many residency interviews did you attend?

How many residencies did you rank?

Do you plan to pursue a fellowship?

- Yes
- No
- Unsure

Do you plan to pursue an academic career?

- Yes
- No
- Unsure

How important were the following in creating your rank list?

|                                                             | Extremely important   | Very important        | Moderately important  | Slightly important    | Not at all important  |
|-------------------------------------------------------------|-----------------------|-----------------------|-----------------------|-----------------------|-----------------------|
| Geographic location                                         | <input type="radio"/> |
| Opportunities for partner                                   | <input type="radio"/> |
| Proximity to partner or family (including couples matching) | <input type="radio"/> |

|                                                                                      | Extremely important   | Very important        | Moderately important  | Slightly important    | Not at all important  |
|--------------------------------------------------------------------------------------|-----------------------|-----------------------|-----------------------|-----------------------|-----------------------|
| Cost of living                                                                       | <input type="radio"/> |
| Ability to live in a particular setting (urban, suburban, rural)                     | <input type="radio"/> |
| Neighborhood/community (culture, diversity, political climate, school systems, etc.) | <input type="radio"/> |
| Extracurricular and/or recreational activities                                       | <input type="radio"/> |
| Patient population                                                                   | <input type="radio"/> |

How important were the following in creating your rank list?

|                                                    | Extremely important   | Very important        | Moderately important  | Slightly important    | Not at all important  |
|----------------------------------------------------|-----------------------|-----------------------|-----------------------|-----------------------|-----------------------|
| Program length (3 vs 4 years)                      | <input type="radio"/> |
| Program type (academic vs community)               | <input type="radio"/> |
| Variety of training sites                          | <input type="radio"/> |
| Compensation/benefits/vacation time/family leave   | <input type="radio"/> |
| Program reputation                                 | <input type="radio"/> |
| Diversity within the program (residents & faculty) | <input type="radio"/> |
| Program commitment to the underserved community    | <input type="radio"/> |
| Interview day experience                           | <input type="radio"/> |
| Experience with residents                          | <input type="radio"/> |
| Experience with faculty                            | <input type="radio"/> |
| Rotation in that ED                                | <input type="radio"/> |
| Second look/shadowing                              | <input type="radio"/> |
| Didactic program / conference                      | <input type="radio"/> |
| Core rotations (ICU, peds, elective, etc.)         | <input type="radio"/> |

|                                                                                                  | Extremely important   | Very important        | Moderately important  | Slightly important    | Not at all important  |
|--------------------------------------------------------------------------------------------------|-----------------------|-----------------------|-----------------------|-----------------------|-----------------------|
| Other educational opportunities (Austere medicine, research, EMS, hyperbarics, ultrasound, etc.) | <input type="radio"/> |

Which choice describes the relative importance of location versus program characteristics in your decision of where to rank programs?

- Completely based on individual program characteristics
- Primarily based on program characteristics, but location played a role
- Equal balance between program characteristics and location
- Primarily based on location, but program characteristics played a role
- Completely based on location

Please describe any “red flags” that caused you to significantly lower the position of a program on your rank list or not rank it at all.

Why was your 2nd ranked program not your 1st? (pick the **most** important reason)

- Program location
- Distance to relatives
- Cost of living
- Spouse/partner preference
- Academic reputation
- Variety of clinical experience
- Educational opportunities
- Shift schedule
- Resident culture
- Program diversity
- Interview experience
- Other (please specify):

Powered by Qualtrics

Table S1. Comparison of applicant responses to the prompt, “Which choice describes the relative importance of location versus program characteristics in your decision of where to rank programs?”

|                                                                               | <b>Current Study<br/>(n=1159)</b> | <b>Love et al.<br/>(n=870)</b> | <b>p</b> |
|-------------------------------------------------------------------------------|-----------------------------------|--------------------------------|----------|
| <b>Primarily based on location, but program characteristics played a role</b> | 27.3%                             | 30.0%                          | 0.182    |
| <b>Equal balance between program characteristics and location</b>             | 30.1%                             | 31.6%                          | 0.469    |
| <b>Primarily based on program characteristics but location played a role</b>  | 37.2%                             | 33.8%                          | 0.114    |
| <b>Completely based on individual program characteristics</b>                 | 4.7%                              | 2.8%                           | 0.075    |
| <b>Completely based on location</b>                                           | 1.1%                              | 1.5%                           | 0.426    |

This table compares our study results with those from *Love JN, Howell JM, Hegarty CB, et al. Factors that influence medical student selection of an emergency medicine residency program: implications for training programs. Acad Emerg Med 2012;19:455-60.*

Symbols include n=number of respondents, p=p-value.
